# Supplementary material for: Organic and inorganic nitrogen amendments reduce biodegradation of biodegradable plastic mulch films
Source: Copernicus journal article supplement (doi:10.5194/soil-9-499-2023), 2023-09-15
Supplement: Supplementary file 1 [file soil-9-499-2023-supplement.pdf]

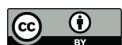

*Supplement of*

## **Organic and inorganic nitrogen amendments reduce biodegradation of biodegradable plastic mulch films**

**Sreejata Bandopadhyay et al.**

*Correspondence to:* Jennifer M. DeBruyn ([jdebruyn@utk.edu](mailto:jdebruyn@utk.edu))

The copyright of individual parts of the supplement might differ from the article licence.

**Table S1: Enzymes assayed before and after 16-week incubation.**

| Abbreviation | Enzyme name                       | Target substrate in |                                          | Indicator of microbial activity |
|--------------|-----------------------------------|---------------------|------------------------------------------|---------------------------------|
|              |                                   | natural environment | Substrate used in experiment             |                                 |
| BG           | $\beta$ -glucosidase              | sugar               | 4-MUB- $\beta$ -D-glucopyranoside        | Carbon cycling                  |
| NAG          | N-acetyl $\beta$ -glucosaminidase | chitin              | 4-MUB-N-acetyl- $\beta$ -D-glucosaminide | Carbon and nitrogen cycling     |
| CB           | $\beta$ -D-cellubiosidase         | cellulose           | 4-MUB- $\beta$ -D-cellobioside           | Carbon cycling                  |

MUB = 4-methylumbelliferone; MUC = 7-amino-4-methylcoumarin

**Table S2: F values from three-way ANOVAs showing effects of location, nitrogen and plastic treatment on soil chemical and biological characteristics. Significant differences are in bold; \*p < 0.05; \*\*p < 0.01; \*\*\*p < 0.001.**

| Factor                    | CO <sub>2</sub> -C<br>(µg C g <sup>-1</sup> dry soil) | NH <sub>4</sub><br>(µg NH <sub>4</sub> g <sup>-1</sup> dry soil) | NO <sub>3</sub><br>(µg NO <sub>3</sub> g <sup>-1</sup> dry soil) | %C                | %N               | C:N              | Log (amoA<br>gene copies<br>g <sup>-1</sup> dry soil) | Log (fungal<br>gene copies<br>g <sup>-1</sup> dry soil) | Log<br>(bacterial<br>gene<br>copies<br>g <sup>-1</sup> dry<br>soil) |
|---------------------------|-------------------------------------------------------|------------------------------------------------------------------|------------------------------------------------------------------|-------------------|------------------|------------------|-------------------------------------------------------|---------------------------------------------------------|---------------------------------------------------------------------|
| Location                  | <b>39.95***</b>                                       | <b>643.26***</b>                                                 | <b>5.01*</b>                                                     | <b>1223.33***</b> | <b>834.61***</b> | <b>141.59***</b> | <b>489.92***</b>                                      | <b>120.31***</b>                                        | <b>18.08***</b>                                                     |
| Nitrogen                  | <b>39.49***</b>                                       | <b>133130***</b>                                                 | <b>119.57***</b>                                                 | <b>7.78***</b>    | <b>16.35***</b>  | <b>6.91**</b>    | <b>3.31*</b>                                          | <b>14.82***</b>                                         | <b>12.43***</b>                                                     |
| Plastic                   | <b>461.34***</b>                                      | 9.52E-01                                                         | 2.57                                                             | 0.04              | 1.36             | 1.88             | <b>10.06**</b>                                        | 3.22                                                    | <b>13.63***</b>                                                     |
| Location:Nitrogen         | <b>6.09**</b>                                         | <b>542.63***</b>                                                 | <b>3.61*</b>                                                     | <b>4.48**</b>     | 2.47             | 2.48             | <b>6.45**</b>                                         | 1.42                                                    | <b>14.25***</b>                                                     |
| Location:Plastic          | <b>31.71***</b>                                       | 3.05E-01                                                         | 0.39                                                             | 4.11              | <b>5.95*</b>     | 0.03             | 2.49                                                  | 1.50                                                    | 0.85                                                                |
| Nitrogen:Plastic          | <b>11.81***</b>                                       | 1.46E+00                                                         | 0.07                                                             | <b>3.47*</b>      | 2.64             | 0.80             | <b>3.30*</b>                                          | <b>5.60**</b>                                           | <b>12.20***</b>                                                     |
| Location:Nitrogen:Plastic | <b>4.68**</b>                                         | 8.13E-01                                                         | 0.21                                                             | 0.77              | 0.31             | 0.62             | <b>3.87*</b>                                          | 2.07                                                    | <b>15.67***</b>                                                     |

**Table S3: C:N ratios, %C and %N of soil before (T0) and after 16-week incubation. TN: Tennessee, WA: Washington. T0: initial soils, prior to experimental amendments. Mean (n=3)  $\pm$  standard error of the mean (SE).**

| <b>Location</b> | <b>Mulch</b> | <b>Nitrogen</b>  | <b>C:N ratio</b>                   | <b>%C</b>                         | <b>%N</b>                          |
|-----------------|--------------|------------------|------------------------------------|-----------------------------------|------------------------------------|
| <b>TN T0</b>    |              |                  | <b>9.43 <math>\pm</math> 0.01</b>  | <b>0.75 <math>\pm</math> 0.01</b> | <b>0.08 <math>\pm</math> 0.001</b> |
| TN              | no           | Amino acid       | 8.33 $\pm$ 0.08                    | 0.69 $\pm$ 0.02                   | 0.08 $\pm$ 0.001                   |
| TN              | no           | Ammonium nitrate | 8.02 $\pm$ 0.06                    | 0.65 $\pm$ 0.02                   | 0.08 $\pm$ 0.002                   |
| TN              | no           | No nitrogen      | 8.84 $\pm$ 0.14                    | 0.70 $\pm$ 0.03                   | 0.08 $\pm$ 0.003                   |
| TN              | no           | Urea             | 8.25 $\pm$ 0.26                    | 0.72 $\pm$ 0.02                   | 0.09 $\pm$ 0.001                   |
| TN              | yes          | Amino acid       | 8.46 $\pm$ 0.13                    | 0.72 $\pm$ 0.01                   | 0.09 $\pm$ 0.002                   |
| TN              | yes          | Ammonium nitrate | 8.12 $\pm$ 0.12                    | 0.68 $\pm$ 0.02                   | 0.08 $\pm$ 0.002                   |
| TN              | yes          | No nitrogen      | 8.93 $\pm$ 0.16                    | 0.73 $\pm$ 0.03                   | 0.08 $\pm$ 0.002                   |
| TN              | yes          | Urea             | 8.25 $\pm$ 0.15                    | 0.70 $\pm$ 0.00                   | 0.09 $\pm$ 0.001                   |
| <b>WA T0</b>    |              |                  | <b>10.69 <math>\pm</math> 0.31</b> | <b>1.23 <math>\pm</math> 0.06</b> | <b>0.12 <math>\pm</math> 0.003</b> |
| WA              | no           | Amino acid       | 9.23 $\pm$ 0.05                    | 1.11 $\pm$ 0.01                   | 0.12 $\pm$ 0.001                   |
| WA              | no           | Ammonium nitrate | 9.52 $\pm$ 0.08                    | 1.14 $\pm$ 0.01                   | 0.12 $\pm$ 0.001                   |
| WA              | no           | No nitrogen      | 9.70 $\pm$ 0.13                    | 1.09 $\pm$ 0.01                   | 0.11 $\pm$ 0.002                   |
| WA              | no           | Urea             | 9.37 $\pm$ 0.11                    | 1.22 $\pm$ 0.03                   | 0.13 $\pm$ 0.004                   |
| WA              | yes          | Amino acid       | 9.40 $\pm$ 0.03                    | 1.12 $\pm$ 0.02                   | 0.12 $\pm$ 0.001                   |
| WA              | yes          | Ammonium nitrate | 9.39 $\pm$ 0.02                    | 1.12 $\pm$ 0.01                   | 0.12 $\pm$ 0.001                   |
| WA              | yes          | No nitrogen      | 10.06 $\pm$ 0.17                   | 1.11 $\pm$ 0.02                   | 0.11 $\pm$ 0.001                   |
| WA              | yes          | Urea             | 9.37 $\pm$ 0.17                    | 1.13 $\pm$ 0.02                   | 0.12 $\pm$ 0.001                   |

**Table S4: Percent biodegradation of BioAgri mulch after 16 weeks. TN: Tennessee, WA: Washington.**

| Treatment        | Location | Theoretical mulch CO <sub>2</sub> -<br>C released<br>( $\mu\text{g mulch-C g}^{-1}$ dry<br>soil) | Theoretical<br>biodegradation<br>(%) |
|------------------|----------|--------------------------------------------------------------------------------------------------|--------------------------------------|
| Urea             | TN       | 49                                                                                               | 4                                    |
| Amino acid       | TN       | 83                                                                                               | 6                                    |
| Ammonium nitrate | TN       | 74                                                                                               | 6                                    |
| No Nitrogen      | TN       | 132                                                                                              | 10                                   |
| Urea             | WA       | 47                                                                                               | 4                                    |
| Amino acid       | WA       | 46                                                                                               | 4                                    |
| Ammonium nitrate | WA       | 41                                                                                               | 3                                    |
| No Nitrogen      | WA       | 63                                                                                               | 5                                    |

Total amount of carbon added in the form of plastic at t=0 was 1309  $\mu\text{g C g}^{-1}$  dry soil for TN jars and 1317  $\mu\text{g C g}^{-1}$  dry soil for WA jars.

**Table S5. Thermogravimetric analysis (TGA) heating stage temperatures and % mass remaining of BioAgri mulch at 600°C. TN: Tennessee, WA: Washington.**

| Treatment            | Temp (°C)             |                         |                       |                         |                       | Mass<br>Remaining<br>(%) |
|----------------------|-----------------------|-------------------------|-----------------------|-------------------------|-----------------------|--------------------------|
|                      | T <sub>0,A</sub> , °C | T <sub>max,A</sub> , °C | T <sub>0,B</sub> , °C | T <sub>max,B</sub> , °C | T <sub>f,B</sub> , °C |                          |
| Control *            | 292.58                | 331.47                  | 389.75                | 411.36                  | 433.17                | 10.48                    |
| Amino acid, TN       | 297.05                | 331.21                  | 390.42                | 412.57                  | 431.69                | 19.94                    |
| Amino acid, WA       | 293.19                | 327.42                  | 384.03                | 406.11                  | 429.19                | 36.81                    |
| Ammonium Nitrate, TN | 291.96                | 331.01                  | 387.22                | 408.12                  | 429.99                | 32.64                    |
| Ammonium Nitrate, WA | 296.23                | 328.75                  | 390.76                | 410.69                  | 430.48                | 17.29                    |
| No Nitrogen, TN      | 296.81                | 333.28                  | 388.39                | 410.88                  | 430.88                | 32.02                    |
| No Nitrogen, WA      | 290.55                | 327.39                  | 391.33                | 410.92                  | 432.10                | 22.05                    |
| Urea, TN             | 295.50                | 329.18                  | 385.76                | 404.45                  | 429.97                | 27.96                    |
| Urea, WA             | 295.42                | 327.86                  | 392.36                | 410.88                  | 431.87                | 17.77                    |

Subscripts for  $T_{i,j}$ : 0 = onset temperature *max* = maximum (most rapid weight loss) temperature, *f* = final temperature for heating stage *i* (A=starch and B=PBAT). % Mass remaining = % inorganics present (e.g., binders: CaCO<sub>3</sub> or nanoclays) or gels. One would expect that as biodegradation (of the polymers) occurs, the measured mass loss will decrease; i.e., the % of inorganics would increase. \*Agriculturally-weathered BioAgri: Taken from Hayes et al. (2017).

**Table S6. Change in molecular weight-related properties of BioAgri mulch during incubation as per gel permeation chromatographic (GPC) analysis. TN: Tennessee, WA: Washington.**

| N Amendment      | Location             |             |                      |             |
|------------------|----------------------|-------------|----------------------|-------------|
|                  | TN                   |             | WA                   |             |
|                  | M <sub>w</sub> , kDa | PDI         | M <sub>w</sub> , kDa | PDI         |
| Control*         | 189 + 12             | 2.51 + 0.06 | 189 + 12             | 2.51 + 0.06 |
| No nitrogen      | 161 + 2              | 4.34 + 0.36 | 151 + 5              | 2.83 + 0.39 |
| Urea             | 151 + 3              | 2.76 + 0.07 | 215 + 1              | 2.09 + 0.12 |
| Amino acid       | 151 + 2              | 2.64 + 0.19 | 157 + 2              | 2.29 + 0.32 |
| Ammonium nitrate | 152 + 2              | 2.51 + 0.13 | 169 + 2              | 2.13 + 0.04 |

*M<sub>w</sub>* = weight-averaged molecular weight (in kDa), PDI = polydispersity index; error bars represent standard deviation; values are based on 2 replicates. \*Agriculturally-weathered BioAgri: Taken from Hayes et al. (2017).

**Table S7. Peak assignments for FTIR analysis for BioAgri mulch (Hayes et al., 2017).**

| Wavenumber (cm <sup>-1</sup> )     | Contribution                            |
|------------------------------------|-----------------------------------------|
| 2956, 2920, 2876, 2846             | C-H stretch                             |
| 1712                               | C=O stretch (polyester)                 |
| 1646                               | C=O stretch (polysaccharide)            |
| 1456, 1410, 1390                   | -CH <sub>2</sub> - bend                 |
| 1268, 1252, 1166, 1118, 1102, 1082 | C-O stretch (polyester)<br>C=C for PBAT |
| 1076-1000                          | (via environmental weathering)          |
| 874                                | C-H stretch                             |
| 728                                | (CH <sub>2</sub> ) <sub>4</sub> bend    |

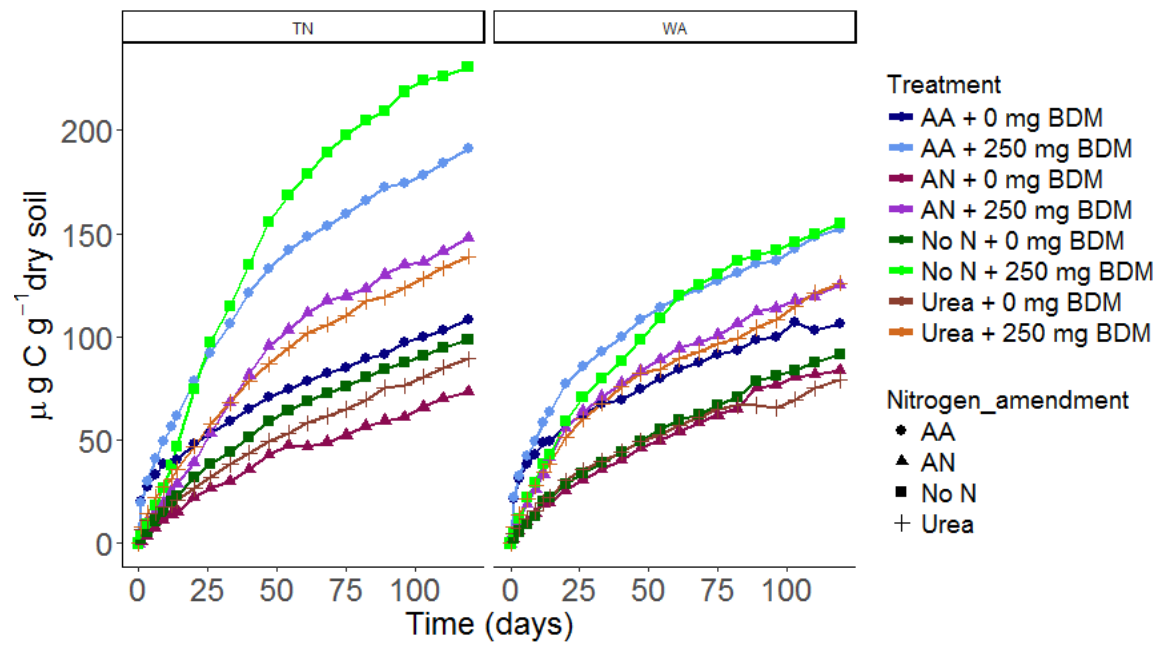

Figure S1: Cumulative CO<sub>2</sub>-C released over 16 weeks. Each data point represents a mean of 3 replicate microcosms. TN: Tennessee, WA: Washington. AA: amino acid, AN: ammonium nitrate.

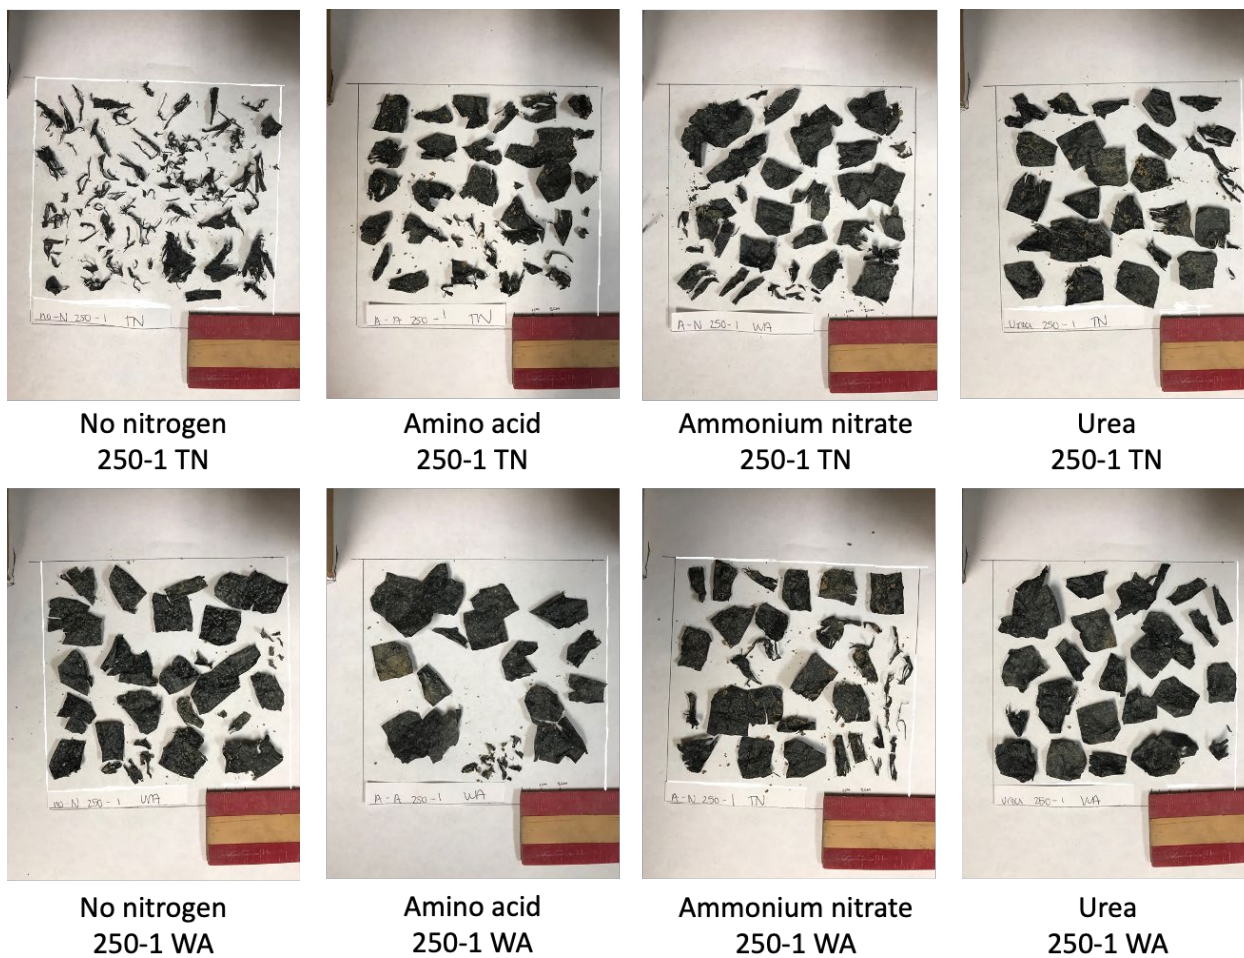

**Figure S2: Visualization of plastic pieces after 16 weeks incubation (raw images). All images were taken from mulches from the first replicate microcosm for each treatment. TN: Tennessee, WA: Washington.**

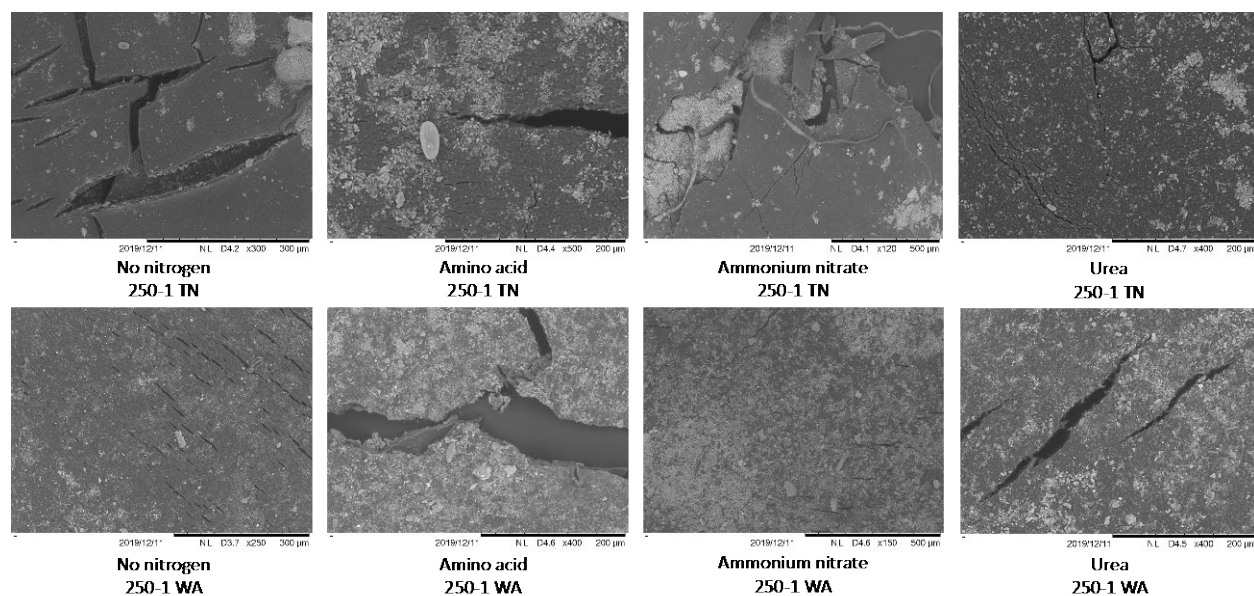

**Figure S3: Scanning electron microscopy (SEM) images of plastic mulches after incubation of 16 weeks. All images were taken from mulches from the first replicate microcosm for each treatment. TN: Tennessee, WA: Washington.**

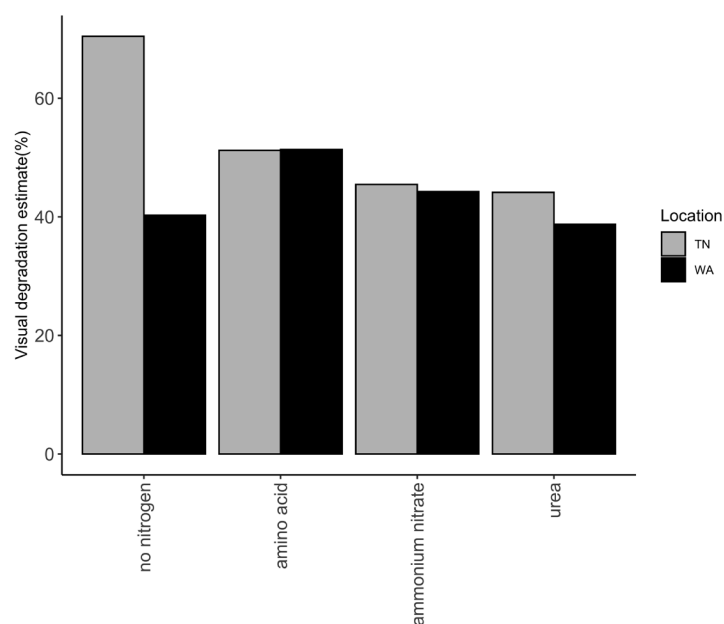

**Figure S4: Percent biodegradation values as estimated by calculating the remaining surface area of mulch pieces after 16-week incubation. Only one rep was visualized per nitrogen treatment. Calculations for surface area done using ImageJ. TN: Tennessee, WA: Washington.**

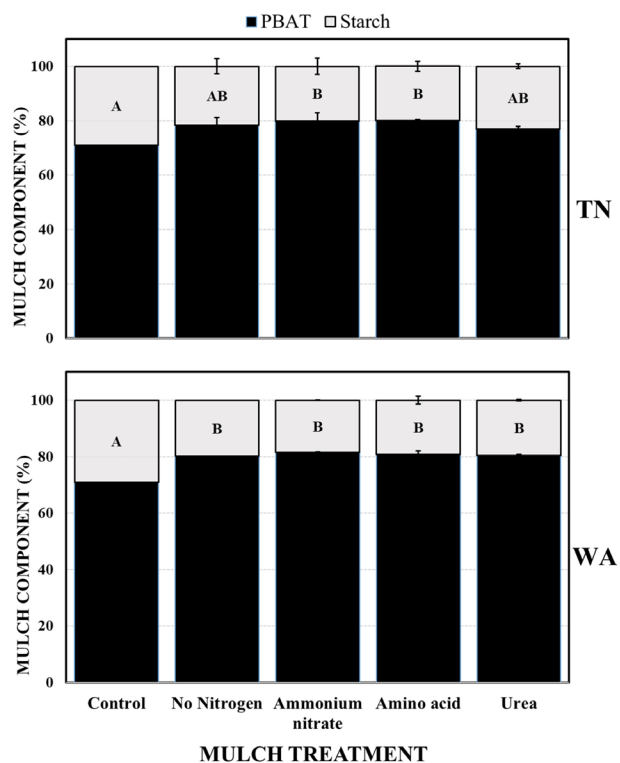

**Figure S5. Starch and PBAT components for BioAgri after 16 weeks of incubation. Mulch component (%) was determined 20°C lower before the onset of degradation process ( $T_0$ , Table S6) and 20°C higher after the rapid degradation process ( $T_{max}$ , Table S6) of each mulch treatment. TN: Tennessee, WA: Washington. Bar plot represents mulch component (%) and error bars reflect standard deviation (where  $n=2$ ). *Control* refers to agriculturally-weathered BioAgri plastic mulch samples in TN, taken from Hayes et al. (2017).**

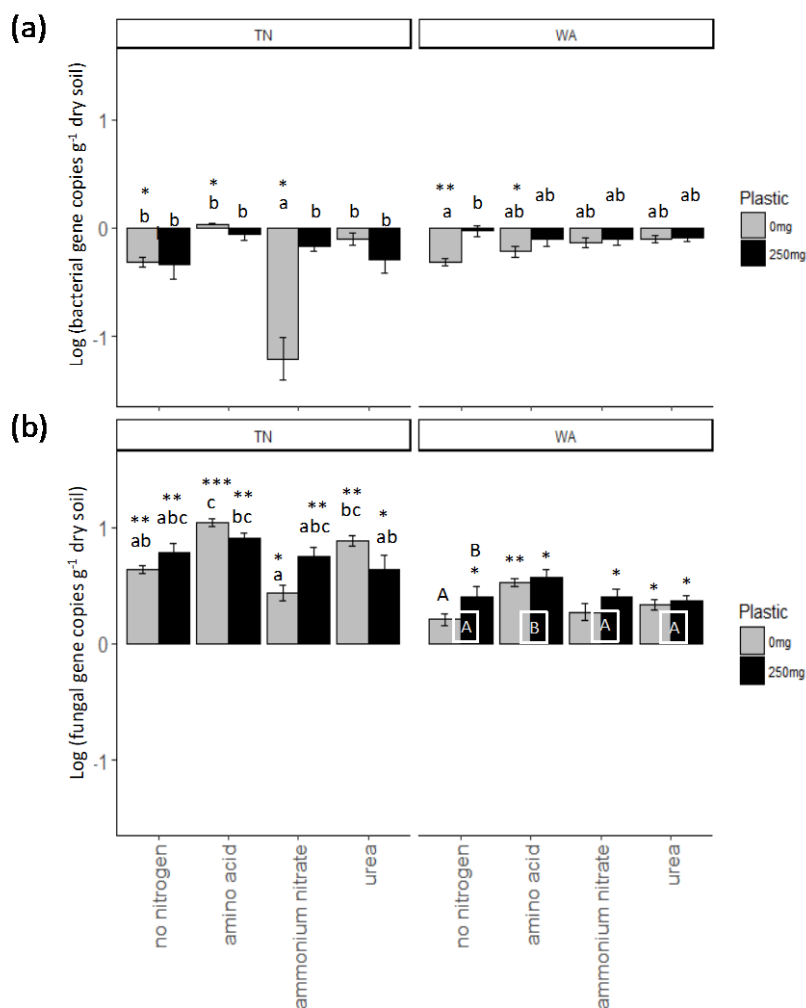

**Figure S6: Changes in (a) bacterial and (b) fungal gene abundances over 16 weeks.** All gene abundances were log transformed, then abundances in initial soils subtracted from final (16 week) samples. Each bar represents a mean of 3 replicate microcosms and error bars are standard error. Lowercase letters indicate interaction effects at  $\alpha \leq 0.05$  for bacterial abundance in TN and WA and fungal abundance in TN. Uppercase letters for fungal abundance in WA along x-axis indicate a significant main effect of nitrogen treatment at  $\alpha \leq 0.05$ . Uppercase letters above bars for fungal gene abundance in WA indicate a significant main effect of plastic at  $\alpha \leq 0.05$ . Asterisks indicate significant increase or decrease in gene abundance from  $t = 0$  as per a  $t$ -test. \*  $p \leq 0.05$ , \*\*  $p \leq 0.01$ , \*\*\*  $p \leq 0.001$ . TN: Tennessee, WA: Washington.

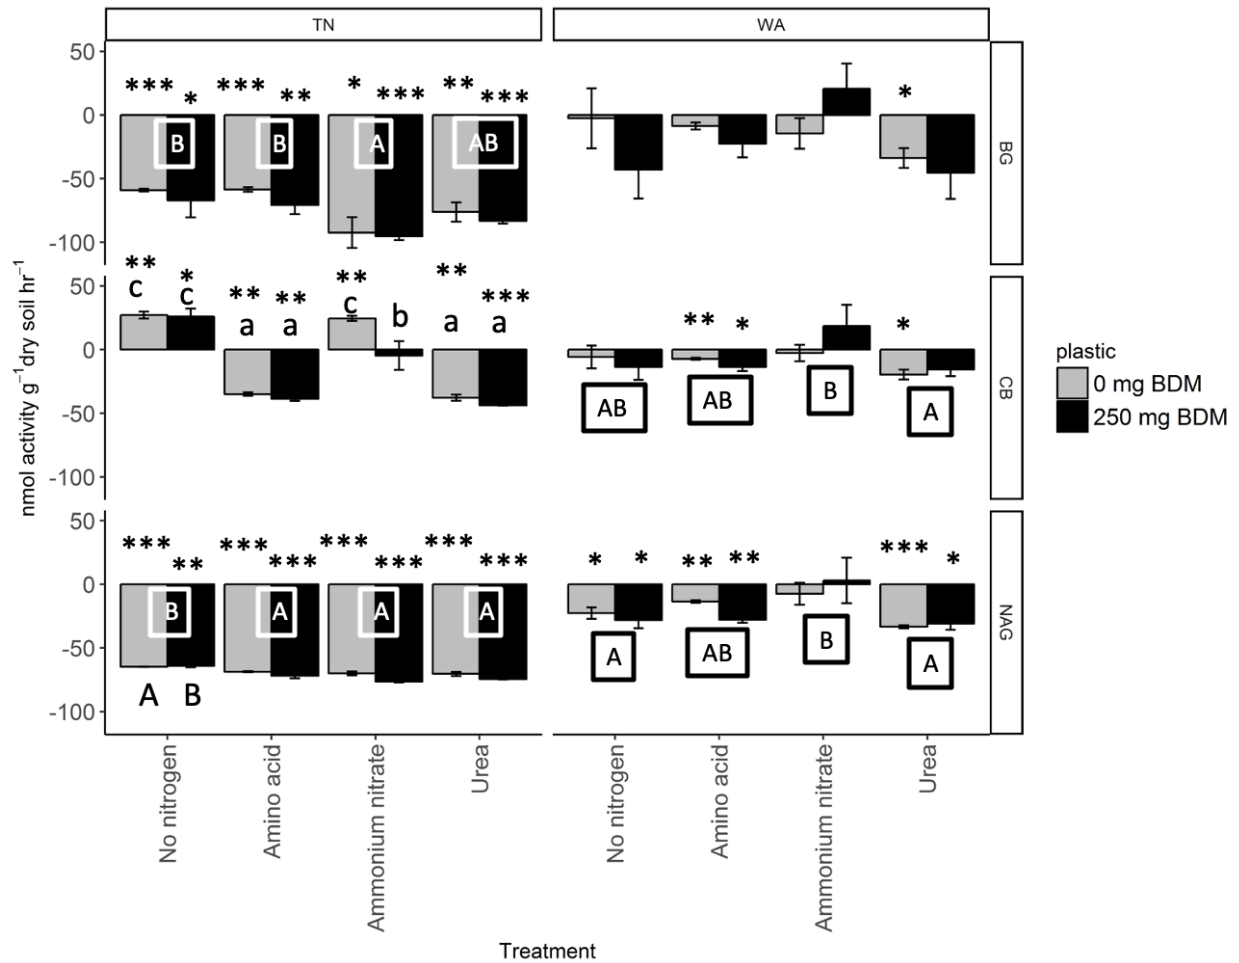

**Figure S7: Changes in enzyme activities of  $\beta$ -glucosidase (BG), cellulobiosidase (CB), and N-acetyl  $\beta$ -D-glucosaminidase (NAG) after 16 weeks. Each bar represents a mean of 3 replicate microcosms and error bars are standard error. Lowercase letters indicate a significant interaction effect at  $\alpha \leq 0.05$ . Boxed uppercase letters indicate a significant main effect of nitrogen at  $\alpha \leq 0.05$ . Unboxed uppercase letters indicate a significant main effect of plastic at  $\alpha \leq 0.05$ . Asterisks indicate significant increase or decrease in enzyme activity from  $t = 0$  based on a  $t$ -test. \*  $p \leq 0.05$ , \*\*  $p \leq 0.01$ , \*\*\*  $p \leq 0.001$ . TN: Tennessee, WA: Washington.**

## References

Hayes, D. G., Wadsworth, L. C., Sintim, H. Y., Flury, M., English, M., Schaeffer, S., and Saxton, A. M.: Effect of diverse weathering conditions on the physicochemical properties of biodegradable plastic mulches, *Polymer Testing*, 62, 454-467, <https://doi.org/10.1016/j.polymertesting.2017.07.027>, 2017.
